# Supplementary material for: Sleep quality, daytime sleepiness, fatigue, and quality of life in patients with multiple sclerosis treated with interferon beta-1b: results from a prospective observational cohort study
Source: PubMed Central journal article supplement (PMC6107945; doi:10.1186/s12883-018-1113-5), 2018-08-24
Supplement: 12883_2018_1113_MOESM3_ESM.pdf [file 12883_2018_1113_MOESM3_ESM.pdf]

Proportion of poor sleepers (PSQI  $\geq 5$ ) during the course of the BETASLEEP study

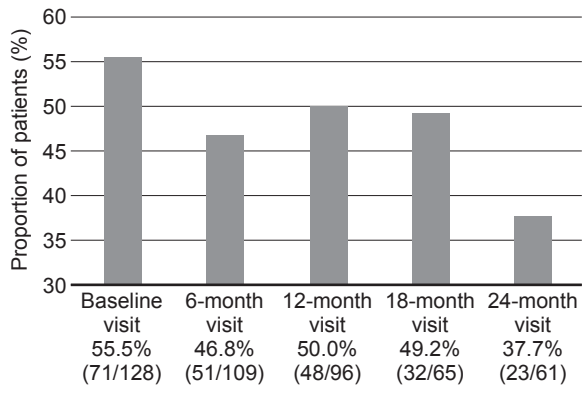

**Additional file 3:** Sleep quality during the course of the BETASLEEP study.  
PSQI, Pittsburg Sleep Quality Index.
